## RESEARCH ARTICLE

## Age- and sex-specific hospital bed-day rates in people with and without type 2 diabetes: A territory-wide population-based cohort study of 1.5 million people in Hong Kong

Hongjiang Wu<sup>1</sup>, Aimin Yang<sup>1,2</sup>, Eric S. H. Lau<sup>1</sup>, Xinge Zhang<sup>1</sup>, Baoqi Fan<sup>1</sup>, Mai Shi<sup>1</sup>, Chuiguo Huang<sup>1</sup>, Ronald C. W. Ma<sup>1,2,3</sup>, Alice P. S. Kong<sup>1,2,3</sup>, Elaine Chow<sup>1</sup>, Wing-Yee So<sup>1,4</sup>, Juliana C. N. Chan<sup>1,2,3</sup>, Andrea O. Y. Luk<sup>1,2,3\*</sup>

**1** Department of Medicine and Therapeutics, The Chinese University of Hong Kong, Hong Kong Special Administrative Region, People's Republic of China, **2** Hong Kong Institute of Diabetes and Obesity, The Chinese University of Hong Kong, Hong Kong Special Administrative Region, People's Republic of China, **3** Li Ka Shing Institute of Health Sciences, The Chinese University of Hong Kong, Hong Kong Special Administrative Region, People's Republic of China, **4** Hong Kong Hospital Authority, Hong Kong Special Administrative Region, People's Republic of China

\* [andrealuk@cuhk.edu.hk](mailto:andrealuk@cuhk.edu.hk)

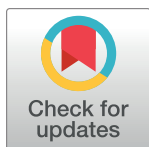

## OPEN ACCESS

**Citation:** Wu H, Yang A, Lau ESH, Zhang X, Fan B, Shi M, et al. (2023) Age- and sex-specific hospital bed-day rates in people with and without type 2 diabetes: A territory-wide population-based cohort study of 1.5 million people in Hong Kong. *PLoS Med* 20(8): e1004261. <https://doi.org/10.1371/journal.pmed.1004261>

**Received:** December 7, 2022

**Accepted:** June 19, 2023

**Published:** August 4, 2023

**Copyright:** © 2023 Wu et al. This is an open access article distributed under the terms of the [Creative Commons Attribution License](https://creativecommons.org/licenses/by/4.0/), which permits unrestricted use, distribution, and reproduction in any medium, provided the original author and source are credited.

**Data Availability Statement:** The data underlying the results presented in the study are hosted by the Hong Kong Hospital Authority. Due to local regulation, the data are not available to the public. Request for data can be made via Hong Kong Hospital Authority: <https://www3.ha.org.hk/data>.

**Funding:** The author(s) received no specific funding for this work.

**Competing interests:** I have read the journal's policy and the authors of this manuscript have the following competing interests: AOYL has received research grants or contracts from Amgen,

## Abstract

## Background

Type 2 diabetes affects multiple systems. We aimed to compare age- and sex-specific rates of all-cause and cause-specific hospital bed-days between people with and without type 2 diabetes.

## Methods and findings

Data were provided by the Hong Kong Hospital Authority. We included 1,516,508 one-to-one matched people with incident type 2 diabetes ( $n = 758,254$ ) and those without diabetes during the entire follow-up period ( $n = 758,254$ ) between 2002 and 2018, followed until 2019. People with type 2 diabetes and controls were matched for age at index date ( $\pm 2$  years), sex, and index year ( $\pm 2$  years). We defined hospital bed-day rate as total inpatient bed-days divided by follow-up time. We constructed negative binomial regression models to estimate hospital bed-day rate ratios (RRs) by age at diabetes diagnosis and sex. All RRs were stratified by sex and adjusted for age and index year. During a median of 7.8 years of follow-up, 60.5% ( $n = 459,440$ ) of people with type 2 diabetes and 56.5% ( $n = 428,296$ ) of controls had a hospital admission for any cause, with a hospital bed-day rate of 3,359 bed-days and 2,350 bed-days per 1,000 person-years, respectively. All-cause hospital bed-day rate increased with increasing age in controls, but showed a J-shaped relationship with age in people with type 2 diabetes, with 38.4% of bed-days in those diagnosed  $< 40$  years caused by mental health disorders. Type 2 diabetes was associated with increased risks for a wide range of medical conditions, with an RR of 1.75 (95% CI [confidence interval] [1.73, 1.76];  $p < 0.001$ ) for all-cause hospital bed-days in men and 1.87 (95% CI [1.85, 1.89];  $p < 0.001$ ) in

AstraZeneca, Bayer, Biogen, Boehringer Ingelheim, Eli Lilly, Junshi, Lee Pharmaceutical, MSD, Novo Nordisk, Roche, Sanofi, Shanghai Junshi Biosciences, Sugardown, Takeda, received travel grants and honoraria for speaking from AstraZeneca, Boehringer Ingelheim, Eli Lilly, MSD. JCNC has received research grants through institutions and/or honoraria for consultancy and/or giving lectures from Applied Therapeutics, AstraZeneca, Bayer, Boehringer Ingelheim, Eli Lilly, Hua Medicine, Lee Powder, Merck Serono, Merck Sharp & Dohme, Pfizer, Sanofi and Viatrix. APSK has received research grants and/or speaker honoraria from Abbott, Astra Zeneca, Bayer, Boehringer Ingelheim, Eli-Lilly, Kyowa Kirin, Merck Serono, Nestle, Novo-Nordisk, Pfizer and Sanofi. RCWM has received research funding from AstraZeneca, Bayer, Merck Sharp & Dohme, Novo Nordisk, Pfizer, Roche Diagnostics and Tricida Inc. for carrying out clinical trials or studies, and from AstraZeneca, Bayer, Boehringer Ingelheim, Daiichi Sankyo and Merck for speaker honoraria or consultancy in advisory boards. All proceeds have been donated to the Chinese University of Hong Kong to support diabetes research. RCMW is member of the editorial board of PLOS Medicine. Other authors have no competing interests to declare.

**Abbreviations:** CI, confidence interval; EMR, electronic medical record; HA, Hospital Authority; RR, rate ratio.

women. The RRs were greater in people with diabetes diagnosed at a younger than older age and varied by sex according to medical conditions. Sex differences were most notable for a higher RR for urinary tract infection and peptic ulcer, and a lower RR for chronic kidney disease and pancreatic disease in women than men. The main limitation of the study was that young people without diabetes in the database were unlikely to be representative of those in the Hong Kong general population with potential selection bias due to inclusion of individuals in need of medical care.

## Conclusions

In this study, we observed that type 2 diabetes was associated with increased risks of hospital bed-days for a wide range of medical conditions, with an excess burden of mental health disorders in people diagnosed at a young age. Age and sex differences should be considered in planning preventive and therapeutic strategies for type 2 diabetes. Effective control of risk factors with a focus on mental health disorders are urgently needed in young people with type 2 diabetes. Healthcare systems and policymakers should consider allocating adequate resources and developing strategies to meet the mental health needs of young people with type 2 diabetes, including integrating mental health services into diabetes care.

## Author summary

### Why was this study done?

- Previous studies examining the association between type 2 diabetes and medical conditions focused on the risk of time-to-first event, which does not capture an individual's disease burden, as many medical conditions can lead to multiple hospital admissions.
- Hospital bed-day rate, defined as cumulative inpatient bed-days per person-time, is a health metric that provides direct estimates on risk of total bed-days associated with a medical condition and indirectly reflects disease severity and inpatient resource use.
- The association between type 2 diabetes and all-cause and cause-specific hospital bed-day rates remains unclear.

### What did the researchers do and find?

- We analysed data from 758,254 people with incident type 2 diabetes and 758,254 matched controls without diabetes in Hong Kong between 2002 and 2018. We compared age- and sex-specific rates of all-cause and cause-specific hospital bed-day rates between the 2 groups.
- All-cause hospital bed-day rate increased with increasing age in controls, but showed a J-shaped relationship with age in people with type 2 diabetes. Among people with type 2 diabetes diagnosed <40 years, 38.4% of hospital bed-days were caused by mental health disorders.

- Type 2 diabetes was associated with increased risks of hospital bed-day rate for a wide range of medical conditions, with the rate ratios (RRs) greater in people with diabetes diagnosed at a younger than older age and varied by sex according to medical conditions. Compared to men, women had a significantly higher RR for urinary tract infection and peptic ulcer but a lower RR for chronic kidney disease and pancreatic disease.

### What do these findings mean?

- It is crucial to consider age and sex differences when planning preventive and therapeutic strategies for type 2 diabetes to reduce hospital bed-days.
- Efforts to provide integrated care and effectively manage risk factors, with a focus on mental health disorders, are urgently needed in young people with type 2 diabetes.

## Introduction

Type 2 diabetes is a complex multisystem disorder that affects about 1 in 10 adults worldwide [1]. The global epidemiology of type 2 diabetes is changing, characterised by a trend towards younger age at diagnosis [2,3] and an increase in the burden of newly emerging complications, such as cancer and liver disease [4], although cardiovascular and renal complications are still the leading causes of morbidity in people with type 2 diabetes.

Studies of the association between type 2 diabetes and medical conditions traditionally focused on the risk of time-to-first event and were restricted to a small set of health outcomes. However, time-to-first event fails to capture an individual's disease burden, as many medical conditions are nonfatal recurrent events that may occur repeatedly leading to multiple hospital admissions. Hospital bed-day rate, defined as cumulative inpatient bed-days per person-time [5], is an alternative health metric that provides direct estimates on risk of total bed-days associated with a medical condition and indirectly reflects disease severity and inpatient resource use. It provides more comprehensive information about the disease progression and additional insights about the burden on healthcare system. To our knowledge, no studies have examined the association between type 2 diabetes and hospital bed-day rate in a comprehensive manner.

Using data from the Hong Kong Diabetes Register that enrolled patients with diabetes attending hospital-based clinics, we have reported a higher risk of hospital bed-day rate for major diabetes-related complications in people with young-onset (diagnosis age <40 years) than usual-onset (diagnosis age  $\geq$ 40 years) type 2 diabetes [5]. However, due to a lack of a comparison group without diabetes, it remains unclear whether the increased risk of hospital bed-day in young-onset type 2 diabetes is independent of longer disease duration and whether there are differences in patterns of hospital bed-days between people with and without diabetes.

In this study, we extended our previous research [5] from traditional complications of type 2 diabetes to a broad range of medical conditions and from a hospital-clinic-based diabetes register to the entire population with incident type 2 diabetes and matched controls without diabetes in Hong Kong. We hypothesised that type 2 diabetes is associated with an increased risk of hospital bed-days for various medical conditions. We aimed to provide a comprehensive analysis to compare age- and sex-specific rates of all-cause and cause-specific hospital bed-days between people with and without type 2 diabetes.

## Methods

### Ethics statement

Approval of the study was obtained from the Chinese University of Hong Kong-New Territories East Cluster Clinical Research Ethics Committee (CREC Ref. No. 2020.032). The requirement for individual patient consent was waived as this study was based on anonymised data from electronic medical record (EMR).

### Study setting and data source

Hong Kong is a special administrative region of China with a population of about 7.5 million. The Hong Kong Hospital Authority (HA) is a statutory body that governs all hospitals and majority of out-patient clinics in the public sector, providing about 90% of all healthcare services in Hong Kong. In 2000, the Hong Kong HA adopted a territory-wide EMR system to routinely collect clinical information for all people attending public hospitals and clinics. We obtained data of all people who have ever had a glucose measurement in the HA EMR system, comprising approximately 60% of people living in Hong Kong. The HA database is broadly representative of the Hong Kong general population in terms of all-cause hospitalisation rate and mortality rate [6,7]. Detailed information on the database has been previously reported [7–9]. We planned the study in May 2022, conducted the analyses between June and December 2022, and performed additional analyses in April 2023 in response to suggestions of journal reviewers. This study is reported as per the Strengthening the Reporting of Observational Studies in Epidemiology (STROBE) guideline ([S1 Checklist](#)).

### Study population

We included all people ( $n = 758,254$ ) with incident (new-onset) type 2 diabetes between 1 January 2002 and 31 December 2018 and aged 18 to 99 years at diabetes diagnosis in the database. A wash-out period of 2 years from 2000 to 2001 was used to exclude people with preexisting diabetes. Incident type 2 diabetes was based on physician diagnosis, laboratory results, and prescriptions of medications [10]. For each individual with incident type 2 diabetes, we randomly selected 1 control who did not have diabetes during the entire follow-up period, matched for age at index date ( $\pm 2$  years), sex, and index year ( $\pm 2$  years) ([S1 Fig](#)). Matching was performed without replacement and a 2-year range matching criterion for age and index year is a reasonable balance between achieving adequate matching quality and maintaining a sufficient sample size. We defined index date for people with type 2 diabetes as the date of diabetes diagnosis. For controls, we randomly assigned an index date to each of them before matching process based on the distribution of index dates in people with type 2 diabetes. Women with gestational diabetes were excluded from the control group. People with preexisting medical conditions at the index date were not excluded from the analyses because we aimed to compare the burden of hospital bed-days in people with and without type 2 diabetes, rather than examining the independent association between diabetes and risk of the first hospitalisation event.

### Follow-up time and outcomes

We followed the study population from index date to 31 December 2019 or date of death, whichever came first. The outcomes of this study were all-cause and cause-specific hospital bed-day rates. We defined hospital bed-day rate as total number of inpatient bed-days divided by follow-up time in person-years [5]. We obtained all hospital admission records from the HA EMR, which were coded using the International Classification of Diseases, Ninth Revision

(ICD-9). We excluded: (1) day-case admissions (defined as admission and discharge on the same day), which were mainly for assessment, review, and/or noninvasive intervention; (2) admissions with an extremely long stay ( $\geq 365$  days in a single admission), which were likely long-term convalescent placements; and (3) pregnancy/delivery-related admissions (ICD-9: 630–679) from the analyses. We used principal diagnosis codes at discharge to classify the causes of hospitalisation. We calculated hospital bed-day rates for all-cause and for 7 broad disease categories as follows: infection/parasites (ICD-9: 001–139), neoplasms (ICD-9: 140–239), mental health disorders (ICD-9: 290–319), circulatory system (ICD-9: 390–459), respiratory system (ICD-9: 460–519), digestive system (ICD-9: 520–579), and genitourinary system (ICD-9: 580–629). These disease categories include both traditional complications of diabetes with well-established causal relationships (e.g., cardiovascular diseases and kidney diseases) and emerging complications of diabetes with increasing evidence of a higher risk of them in people with diabetes (e.g., cancers and liver disease). In addition, we assessed 72 (68 for men and 70 for women) selected specific medical conditions, which contributed to  $>1\%$  of inpatient bed-days among each broad disease category (S1 Table).

### Statistical analysis

We performed all analyses separately for men and women and by age group at index date (18 to 39, 40 to 59, 60 to 79, and 80 to 99 years). Hospital bed-day rate was expressed as number of bed-days per 1,000 person-years. Given the overdispersion of the data, we constructed negative binomial regression models to estimate hospital bed-day rate ratios (RRs) with 95% confidence intervals (CIs) comparing people with and without type 2 diabetes. All models were adjusted for age and index year, although there was little difference in RRs between unadjusted and adjusted models as a consequence of using matching design [11]. To provide more comprehensive information to inform public health interventions, we also calculated the excess absolute risk of hospital bed-days associated with type 2 diabetes, which represents the difference in the rate of hospital bed-days between people with type 2 diabetes and controls. A two-tailed  $p$ -value less than 0.05 was considered statistically significant in the primary analyses. Given that our analyses included a large number of outcomes, we additionally corrected for  $p$ -values for multiple comparisons using the Bonferroni method to reduce the probability of false-positive results. A  $p$ -value less than 0.0036 ( $= 0.05/14$  broad disease categories in 2 sexes) for broad disease categories and a  $p$ -value less than 0.00036 ( $= 0.05/138$  medical conditions in 2 sexes) for selected medical conditions in two-tailed tests were considered statistically significant after adjustment for multiple comparisons.

We performed all analyses using R software, version 4.0.3 (R Foundation for Statistical Computing, Vienna, Austria).

### Results

A total number of 1,516,508 one-to-one matched people with incident type 2 diabetes and controls without diabetes were included in the analysis. Among people with type 2 diabetes, 51.6% of them were men, the mean (standard deviation) age at diabetes diagnosis was 62.8 (13.1) years, and 4.1% were diagnosed under the age of 40 years (S2 Table). Men were diagnosed with type 2 diabetes roughly 2 years younger than women (61.9 [12.7] versus 63.8 [13.5] years).

### Absolute risk of hospital bed-days

During a median (interquartile range) of 7.8 (4 to 12) years of follow-up (with 12.5 million person-years), 60.5% ( $n = 459,440$ ) of people with type 2 diabetes and 56.5% ( $n = 428,296$ ) of

**Table 1. Inpatient bed-days and crude hospital bed-day rates for broad disease categories in people with and without type 2 diabetes.**

| Causes of hospitalisation  | Type 2 diabetes (N = 758,254)                           |                                        |                                                      | Controls (N = 758,254)                                  |                                        |                                                      | Adjusted hospital bed-day rate ratio* |
|----------------------------|---------------------------------------------------------|----------------------------------------|------------------------------------------------------|---------------------------------------------------------|----------------------------------------|------------------------------------------------------|---------------------------------------|
|                            | Number of people with hospitalisation (% of all people) | Inpatient bed-days (% of all bed-days) | Crude hospital bed-day rate (per 1,000 person-years) | Number of people with hospitalisation (% of all people) | Inpatient bed-days (% of all bed-days) | Crude hospital bed-day rate (per 1,000 person-years) |                                       |
| <b>Men (N = 783,000)</b>   |                                                         |                                        |                                                      |                                                         |                                        |                                                      |                                       |
| Infection/parasites        | 29,818 (7.6)                                            | 464,283 (4.4)                          | 153.1                                                | 21,270 (5.4)                                            | 323,368 (4.1)                          | 101.8                                                | 2.11 (2.04, 2.18)                     |
| Neoplasms                  | 42,011 (10.7)                                           | 1,132,124 (10.6)                       | 373.4                                                | 40,998 (10.5)                                           | 1,120,542 (14.1)                       | 352.9                                                | 1.53 (1.49, 1.58)                     |
| Mental health disorders    | 12,591 (3.2)                                            | 615,451 (5.8)                          | 203.0                                                | 11,823 (3.0)                                            | 524,575 (6.6)                          | 165.2                                                | 1.13 (1.07, 1.20)                     |
| Circulatory system         | 89,295 (22.8)                                           | 1,799,644 (16.9)                       | 593.5                                                | 62,880 (16.1)                                           | 1,054,251 (13.3)                       | 332.0                                                | 2.27 (2.23, 2.32)                     |
| Respiratory system         | 63,633 (16.3)                                           | 1,557,922 (14.6)                       | 513.8                                                | 59,680 (15.2)                                           | 1,555,735 (19.6)                       | 489.9                                                | 1.46 (1.43, 1.49)                     |
| Digestive system           | 66,184 (16.9)                                           | 795,691 (7.5)                          | 262.4                                                | 58,745 (15.0)                                           | 601,639 (7.6)                          | 189.5                                                | 1.68 (1.65, 1.72)                     |
| Genitourinary system       | 48,027 (12.3)                                           | 724,963 (6.8)                          | 239.1                                                | 34,213 (8.7)                                            | 369,695 (4.7)                          | 116.4                                                | 2.94 (2.86, 3.01)                     |
| All-cause                  | 239,150 (61.1)                                          | 10,669,349 (100)                       | 3,518.9                                              | 226,170 (57.8)                                          | 7,920,791 (100)                        | 2,494.5                                              | 1.75 (1.73, 1.76)                     |
| <b>Women (N = 733,508)</b> |                                                         |                                        |                                                      |                                                         |                                        |                                                      |                                       |
| Infection/parasites        | 29,179 (8.0)                                            | 364,202 (3.7)                          | 117.7                                                | 20,258 (5.5)                                            | 236,347 (3.3)                          | 73.7                                                 | 2.30 (2.23, 2.38)                     |
| Neoplasms                  | 35,901 (9.8)                                            | 885,143 (8.9)                          | 286.0                                                | 31,819 (8.7)                                            | 762,860 (10.8)                         | 238.0                                                | 1.68 (1.63, 1.74)                     |
| Mental health disorders    | 14,874 (4.1)                                            | 689,070 (7.0)                          | 222.7                                                | 13,275 (3.6)                                            | 485,877 (6.9)                          | 151.6                                                | 1.39 (1.31, 1.46)                     |
| Circulatory system         | 76,204 (20.8)                                           | 1,697,764 (17.1)                       | 548.6                                                | 56,033 (15.3)                                           | 1,036,210 (14.7)                       | 323.3                                                | 2.25 (2.20, 2.30)                     |
| Respiratory system         | 52,839 (14.4)                                           | 992,821 (10.0)                         | 320.8                                                | 47,092 (12.8)                                           | 907,262 (12.8)                         | 283.1                                                | 1.67 (1.63, 1.71)                     |
| Digestive system           | 55,007 (15.0)                                           | 658,013 (6.6)                          | 212.6                                                | 45,392 (12.4)                                           | 485,805 (6.9)                          | 151.6                                                | 1.76 (1.72, 1.80)                     |
| Genitourinary system       | 49,606 (13.5)                                           | 733,492 (7.4)                          | 237.0                                                | 31,986 (8.7)                                            | 358,699 (5.1)                          | 111.9                                                | 2.64 (2.57, 2.71)                     |
| All-cause                  | 220,290 (60.1)                                          | 9,913,789 (100)                        | 3,203.6                                              | 202,126 (55.1)                                          | 7,069,885 (100)                        | 2,205.9                                              | 1.87 (1.85, 1.89)                     |

\* Based on negative binomial regression models with adjustment for age and index year.

<https://doi.org/10.1371/journal.pmed.1004261.t001>

controls had been admitted to hospital for any cause, with a crude all-cause hospital bed-day rate of 3,359 bed-days and 2,350 bed-days per 1,000 person-years, respectively (Table 1). Among the 7 broad disease categories, circulatory conditions and respiratory conditions contributed to the largest number of inpatient bed-days in both people with type 2 diabetes and controls. The number of people with hospitalisations for each single broad disease category and their combinations is shown in S2 Fig. The crude hospital admission rate and median inpatient bed-days for each admission are shown in S3 Table.

The age-specific patterns of hospital bed-day rate differed substantially between people with type 2 diabetes and controls (Fig 1). In people with type 2 diabetes, there was a J-shaped relationship between age at diabetes diagnosis and rate of all-cause hospital bed-days, with the rate higher in people diagnosed at <40 years and ≥60 years than those diagnosed at 40 to 59 years. In controls, the rate of all-cause hospital bed-days increased constantly with age. In people with type 2 diabetes diagnosed under the age of 40 years, mental health disorders were the

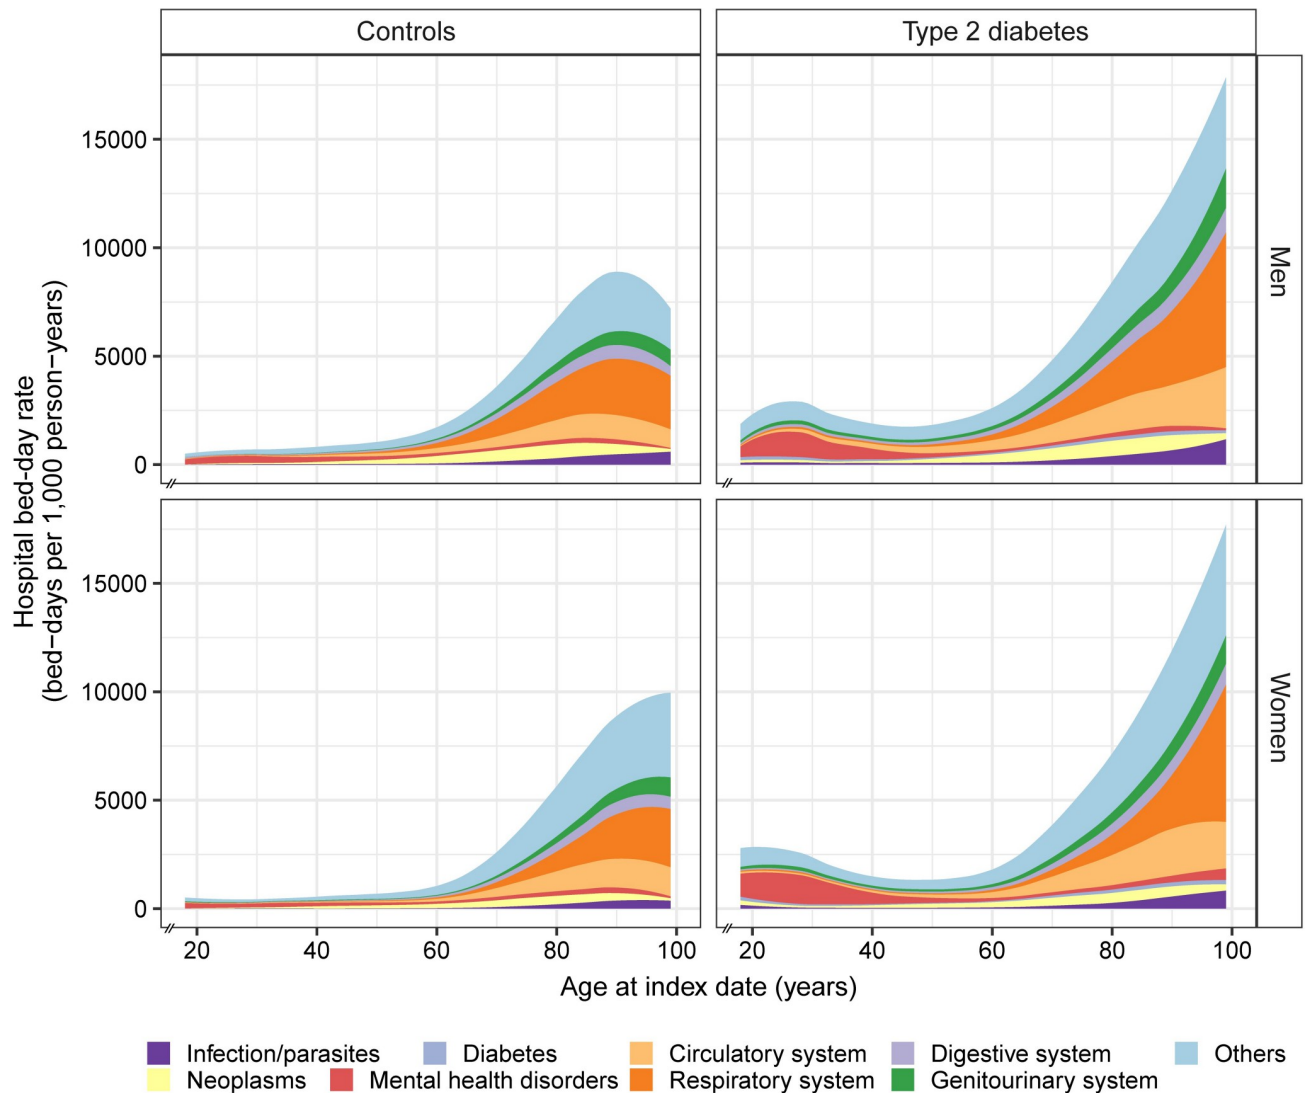

**Fig 1. Crude hospital bed-day rates for broad disease categories by age at index date in people with and without type 2 diabetes.** The x-axis begins at 18 years at index date.

<https://doi.org/10.1371/journal.pmed.1004261.g001>

leading cause of hospital bed-days, accounting for 38.4% of all bed-days, with the proportion being significantly higher in women (45.4%) than men (33.0%) (Fig 1). With increasing age at diabetes diagnosis, the predominant causes of hospital bed-days shifted from mental health disorders to circulatory conditions and respiratory conditions. Hospital bed-day rates for all the broad disease categories were higher in people with type 2 diabetes than controls (Fig 2 and Table 1). The excess absolute risk of hospital bed-days for the broad disease categories associated with type 2 diabetes was generally greater in older than younger people, except for mental health disorders. The excess absolute risk of hospital bed-day rates for mental health disorders was greater in younger as compared to older people, particularly in women (Fig 2) and largely due to schizophrenia and bipolar disorder (S3 Fig).

Among the 72 selected medical conditions, the highest hospital bed-day rates were observed for pneumonia, ischemic stroke, chronic obstructive pulmonary disease, heart failure, and ischemic heart disease in both people with type 2 diabetes and controls (S4 Fig). Men had

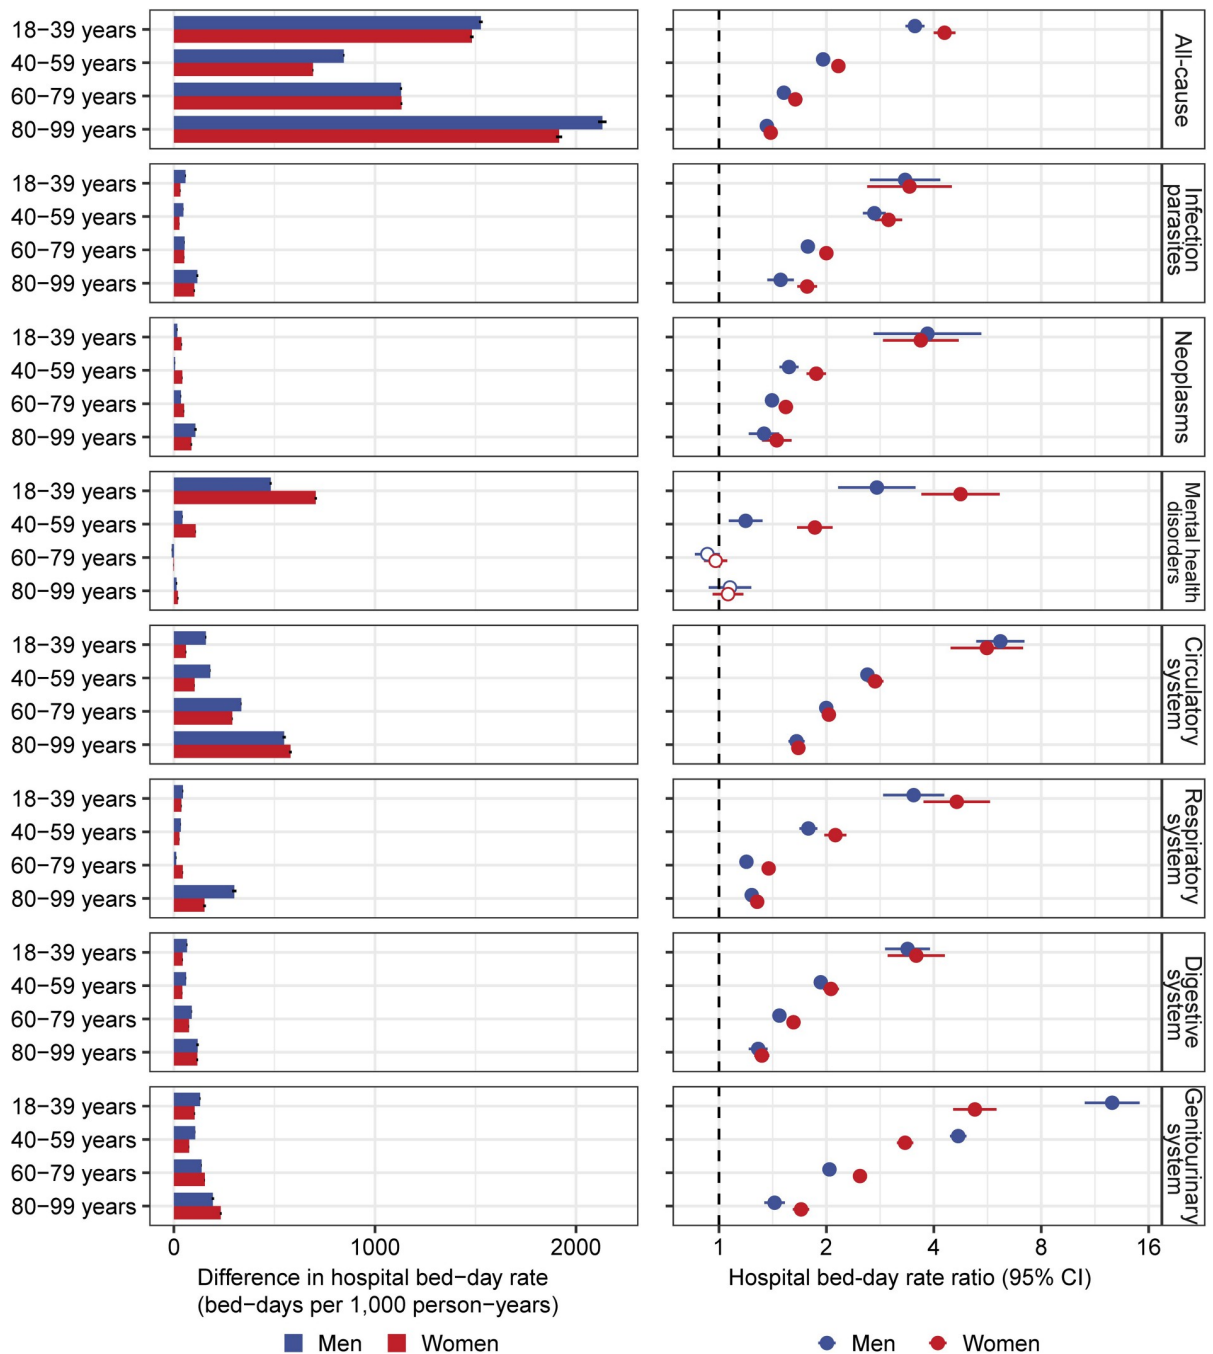

**Fig 2. Age- and sex-specific excess absolute risk of hospital bed-days and hospital bed-day RRs for broad disease categories comparing people with and without type 2 diabetes.** All hospital bed-day RRs were adjusted for age and index year. Dots are point estimates and lines are 95% CIs. CI, confidence interval; RR, rate ratio.

<https://doi.org/10.1371/journal.pmed.1004261.g002>

higher absolute rates of hospital bed-days for all-cause and for the majority of medical conditions, with the exception of urinary tract infection, heart failure, and certain mental health disorders being higher in women than men.



## Relative risk of hospital bed-days comparing people with type 2 diabetes and controls

Compared to controls, type 2 diabetes was associated with 1.75-fold (95% CI [1.73, 1.76];  $p < 0.001$ ) and 1.87-fold (95% CI [1.85, 1.89];  $p < 0.001$ ) increased risk of all-cause hospital bed-days in men and women, respectively (Table 1). The RRs for the broad disease categories were generally greater in women than men, except for genitourinary system diagnoses. In both sexes, the highest RR was observed for genitourinary system diagnoses (RR in men: 2.94, 95% CI [2.86, 3.01];  $p < 0.001$ ; RR in women: 2.64, 95% CI [2.57, 2.71];  $p < 0.001$ ) and the lowest for mental health disorders (RR in men: 1.13, 95% CI [1.07, 1.20];  $p < 0.001$ ; RR in women: 1.39, 95% CI [1.31, 1.46];  $p < 0.001$ ). The RRs for all the broad disease categories remained statistically significant in both sexes after Bonferroni correction.

The RRs for the association between type 2 diabetes and hospital bed-day rates were significantly higher in people with younger than older age at diabetes diagnosis in both sexes (Fig 2 and S4 Table). The RR for all-cause hospital bed-days was 3.54 (95% CI [3.33, 3.76];  $p < 0.001$ ) in men and 4.29 (95% CI [4.00, 4.60];  $p < 0.001$ ) in women with type 2 diabetes diagnosed at 18 to 39 years and decreased to 1.36 (95% CI [1.33, 1.40];  $p < 0.001$ ) in men and 1.40 (95% CI [1.37, 1.42];  $p < 0.001$ ) in women diagnosed at 80 to 99 years. Sex differences in RR varied by age and were most evident for mental health disorders and genitourinary conditions (Fig 2). The increased risk of hospital bed-days for mental health disorders in people with type 2 diabetes was only observed for those aged  $<60$  years at index date, with the association consistently stronger in women than men. In contrast, RR for genitourinary system was greater in men than women at ages of  $<60$  years, but reversed between sexes in older ages.

Among the 72 selected medical conditions, 58 of them in men and 60 in women had an RR greater than 1 and was statistically significant at  $p$ -value of 0.05 (Fig 3 and S5 Table). After Bonferroni correction, the RRs for 53 medical conditions in both sexes remained statistically significant (Fig 3 and S6 Table). The greatest RR was 6.00 (95% CI [5.59, 6.45];  $p < 0.001$ ) for chronic kidney disease and 5.39 (95% CI [4.52, 6.44];  $p < 0.001$ ) for peripheral vascular disease in men, and 6.09 (95% CI [4.31, 8.59];  $p < 0.001$ ) for peripheral vascular disease and 5.25 (95% CI [4.25, 6.50];  $p < 0.001$ ) for pancreatic cancer in women. Similarly, the RRs for most medical conditions were greatest in the youngest age group and declined with increasing age at diabetes diagnosis in both sexes (S5 Fig). Sex differences were most notable for a higher RR for urinary tract infection, peptic ulcer, septicemia, and ischemic heart disease and a lower RR for chronic kidney disease and pancreatic disease in women than men (Fig 3).

## Discussion

In this territory-wide population-based cohort study of over 1.5 million people, we provide a comprehensive landscape on the burden of hospital bed-days for 7 broad disease categories and 72 selected medical conditions in people with versus those without type 2 diabetes with 3 key findings. First, presence of type 2 diabetes was associated with increased risks of hospital bed-days for a broad range of medical conditions. Second, absolute risk of all-cause hospital bed-days increased with increasing age in people without diabetes, but showed a J-shaped relationship with age in people with type 2 diabetes characterised by a considerably high burden of bed-days due to mental health disorders in young-onset type 2 diabetes. Third, there were important age- and sex-related disparities in relative risk of hospital bed-days associated with type 2 diabetes, with the relative risks being substantially greater in people diagnosed at a younger than older age and varying between the sexes by different medical conditions.

Our study provided novel estimates and new insights into the burden of hospital bed-days in people with and without type 2 diabetes. The magnitude of relative risk for hospital bed-

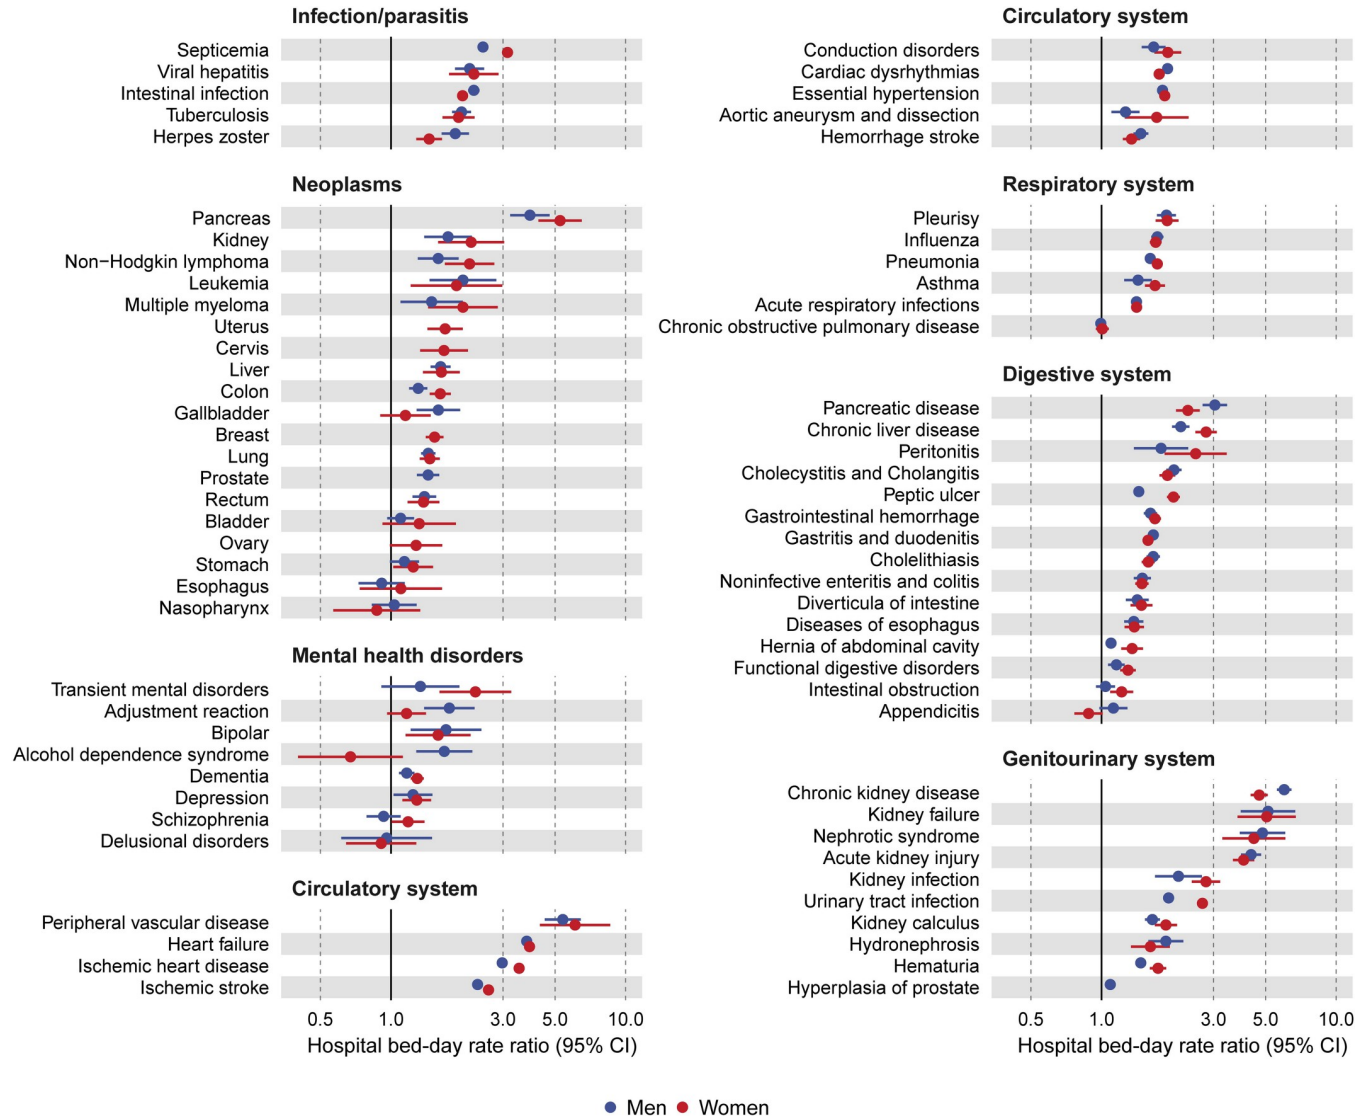

**Fig 3. Sex-specific hospital bed-day RRs for the selected medical conditions comparing people with and without type 2 diabetes.** All hospital bed-day RRs were adjusted for age and index year. Dots are point estimates and lines are 95% CIs. A filled circle indicates that the association remained statistically significant after Bonferroni correction (*p*-value less than 0.00036). CI, confidence interval; RR, rate ratio.

<https://doi.org/10.1371/journal.pmed.1004261.g003>

days associated with type 2 diabetes was greater than that reported for time-to-first hospitalisation event in the previous studies. For example, previous studies have reported that type 2 diabetes was associated with a 2-fold increased risk of first incident heart failure [12] and pancreatic cancer [13]. In our study, we observed a 4- to 5-fold increased risk of inpatient-bed days for heart failure and pancreatic cancer in people with type 2 diabetes as compared to controls. The discrepancy may be attributable to the choice of outcome measure, as hospital bed-days take into account factors leading to hospitalisation as well as those affecting the length of stay. Importantly, the association between type 2 diabetes and hospital bed-days extended to a broad range of medical conditions that had not been conventionally attributed to diabetes such as diseases of the respiratory and digestive systems. This finding was supported by an Australian study, which observed that people with type 2 diabetes had an increased hospitalisation rate for most medical conditions at ICD-10 three-digit diagnosis level compared to the

general population [14]. The Australian study found that infections (e.g., gastrointestinal infections and respiratory infections) and mental health disorders (e.g., schizophrenia and depression) were emerging as leading causes of hospitalisation in people with diabetes and their excess hospitalisations associated with type 2 diabetes exceeded that of many traditional complications. The increased burden of nontraditional complications in diabetes was also reported by an analysis of UK primary care data, which found that there was a shift in leading causes of hospitalisation in people with diabetes from vascular diseases to nontraditional complications, such as liver disease and respiratory infections [15].

The explanations for the high hospital bed-day rates in people with type 2 diabetes are multifactorial and may include both causal and noncausal mechanisms. Type 2 diabetes may causally increase the risk of first and recurrent medical conditions requiring hospitalisations such as cardiovascular and kidney diseases. Through shared social, behavioural, environmental, and genetic risk factors, type 2 diabetes may also be indirectly linked to development or exacerbation of other medical conditions such as mental health disorders [16–18]. Lastly, the frequent coexistence of multiple cardiometabolic risk factors, other morbidities, and polypharmacy in people with diabetes increase their vulnerabilities during each hospitalisation, potentially contribute to more serious manifestation of the presenting illness and reduced response to treatment, thus prolong the length of hospital stay [19,20].

The very large sample size has allowed us to examine detailed age- and sex-related differences in hospital bed-day rates for a large number of medical conditions. We observed that the relative risk of hospital bed-days was most pronounced in the youngest age group and declined with increasing age at diabetes diagnosis. By studying a cohort of incident type 2 diabetes and including a comparison group without diabetes, we were able to disentangle the impact of age at diabetes diagnosis independent of diabetes duration and demonstrate the inherently aggressive nature of type 2 diabetes in young age [21,22]. In addition to clinical inertia and insufficient management guidelines for young-onset type 2 diabetes [23], people with type 2 diabetes diagnosed at a younger age have more rapid deterioration of  $\beta$ -cell function [24], worse metabolic risk profiles [25], and poorer response to glucose-lowering treatment [26] than those diagnosed at an older age. These factors, together with long disease duration, may result in a particularly high lifetime burden of morbidity in young-onset type 2 diabetes.

The J-shaped association of age with hospital bed-day rates in people with type 2 diabetes characterised by a small peak in hospital bed-day rate in young age group is particularly worrying. Importantly, about 40% of total bed-days in young-onset type 2 diabetes were caused by mental health disorders. Previous studies suggested that mental health disorders are bidirectionally associated with type 2 diabetes and the associations are more marked in younger than older people [27]. Although type 2 diabetes is not common in young age, the incidence of most mental health disorders peaks in adolescents and young adulthood, with more than 60% of incident cases of all types of mental health disorders occurring before the age of 25 years worldwide [28]. The mean age of presentation of type 2 diabetes in people with mental health disorders was reported to be 10 to 20 years younger than that in people without mental health disorders [29]. The mechanisms linking type 2 diabetes and mental health disorders are complex. Heightened hypothalamic–pituitary–adrenal axis and activated sympathetic nervous system in people with mental health disorders can lead to hormonal changes and insulin resistance [30]. Certain classes of psychotropic drugs, such as second-generation antipsychotic drugs, are orexigenic and can cause weight gain and metabolic decompensation [31]. Furthermore, people with comorbid diabetes and mental health disorders had high prevalence of non-adherence to drugs and self-care, associated with suboptimal glycaemic control and frequent hypoglycaemia [32]. Although guidelines recommend screening for mental health disorders in people with type 2 diabetes and vice versa [33,34], their implementation in clinical practice is

suboptimal. Up to 45% of cases of depression in people with diabetes and 70% of cases of diabetes in people with severe mental health disorders were undetected [35,36]. The high rate of co-occurrence of mental health disorders and type 2 diabetes especially in young people extended previous findings in a register-based study [5] and calls for urgent awareness program among all stakeholders to take actions. Further research is needed to provide evidence for the effectiveness of proactive screening and focused interventions for mental health disorders in young people with type 2 diabetes. In this context, our group had reported 30% risk reduction in hospitalisation in patients with type 2 diabetes who received technologically enhanced structured assessment program with risk stratification, patient empowerment, and shared decision-making compared to those receiving usual care [37].

Notably, type 2 diabetes was no longer associated with increased risk of hospital bed-days for mental health disorders in older people aged >60 years at diagnosis. In this group, the multiple morbidities might have become prominent features and it remained possible that these individuals might have undiagnosed or underreporting of mental health disorders during hospitalisation [38]. There are also differences in major subtypes of mental health disorders and clinical manifestations between the young and the elderly.

Women had a lower absolute risk but greater relative risk of all-cause and most cause-specific hospital bed-days in the presence of type 2 diabetes as compared to men. This is supported by previous studies showing that women experienced more rapid deteriorations in weight, blood lipid, and blood glucose profiles during their progression from normoglycaemia to diabetes than men [39,40]. Moreover, women with diabetes were less likely to receive optimal care and had lower attainment rates for most metabolic targets than men [41]. The sex differences in associations between type 2 diabetes and certain medical conditions were age dependent, which have not been well reported. For example, the relative risk of hospital bed-days for genitourinary conditions was greater in men compared to women diagnosed below 60 years, but the direction of this sex difference reversed in older ages. This was driven by a shift in major cause of genitourinary hospitalisations from chronic kidney disease in young people to urinary tract infection in older people.

This study has several strengths, including the territory-wide coverage of the study population across the full-age spectrum, complete capture of hospitalisation records in the public sector during the full follow-up period, and comprehensive assessment of a wide range of medical conditions. This study also has several limitations. First, this study was based on the HA EMR with inherent limitations, such as miscoding, misdiagnosis, and misclassification. However, high quality and accuracy of hospital discharge codes has been well reported in administrative data, which are sufficiently robust to support their use for research purposes [42]. Second, young people without diabetes in the 18 to 39 years age group were unlikely to be representative of those in the Hong Kong general population with potential selection bias due to inclusion of individuals in need of medical care. This could lead to underestimation of relative risk in people with young-onset diabetes. These young people (aged <40 years at index date) accounted for 4% of the total study population which should have little impact on relative risk estimates in the overall population and were unlikely to bias the trend across age groups. Third, around 10% of all inpatient bed-days in Hong Kong were provided by private sector and were not captured in the HA EMR. Fourth, we only focused on medical conditions requiring hospitalisation. Mild illnesses treated in outpatient settings were not included and were out of the scope of this study. Fifth, both the clinical threshold for hospital admission and length of inpatient stay are affected by local practice and vary across settings, which may limit the generalisability to other regions. Sixth, we did not explore factors contributing to the high risk of hospital bed-days in people with type 2 diabetes and we did not provide causal inference

on these associations. Last, data on some important confounders, such as socioeconomic status, were not available in our study, and therefore, we were not able to control for them.

The findings of our study highlight the need for effective management strategies to reduce the burden of hospital bed-days in people with type 2 diabetes. It is crucial for public health policymakers and healthcare providers to be aware of age- and sex-related disparities in both absolute and relative risk of hospital bed-days associated with type 2 diabetes and to provide tailored interventions and care. The substantial burden of hospital bed-days caused by mental health disorders in young people with type 2 diabetes calls for healthcare systems to allocate adequate resources and develop targeted strategies to meet their mental health needs. Integrating mental health services into diabetes care, including routine screening for mental health conditions, early intervention, and appropriate treatment and support, has the potential to improve patient outcomes and reduce hospitalisations [43,44]. Further research is warranted to investigate the underlying factors linking type 2 diabetes and increased risk of hospital bed-days and to determine whether these associations are causal or not.

In conclusion, type 2 diabetes was associated with increased risks of hospital bed-days for a wide range of medical conditions, with an excess burden of mental health disorders in people diagnosed at a young age. These associations were more pronounced in people diagnosed at a younger than older age and varied by sex. The findings of our study suggest that age and sex differences should be considered in planning preventive and therapeutic strategies for type 2 diabetes. Integrated care and effective control of risk factors with a focus on mental health disorders are urgently needed in people with young-onset type 2 diabetes to reduce both the high absolute and relative risk of hospital bed-days in this vulnerable population.

## Supporting information

**S1 Checklist. STROBE Statement Checklist.**

(DOC)

**S1 Table. ICD-9 codes for the selected medical conditions.**

(DOCX)

**S2 Table. Baseline characteristics of the study population at index date.**

(DOCX)

**S3 Table. Crude hospital admission rate and median inpatient bed-days for each admission in people with type 2 diabetes and controls.**

(DOCX)

**S4 Table. Age- and sex-specific hospital bed-day rate ratios associated with type 2 diabetes for broad disease categories.**

(DOCX)

**S5 Table. Sex-specific hospital bed-day rate ratios associated with type 2 diabetes for the selected medical conditions.**

(DOCX)

**S6 Table. Hospital bed-day rate ratio for 12 medical conditions that became statistically nonsignificant at  $p$ -value less than 0.00036 after Bonferroni correction.**

(DOCX)

**S1 Fig. Flowchart of study population selection.**

(DOCX)

**S2 Fig. Number of people admitted to hospital by the 7 broad disease categories.**  
(DOCX)

**S3 Fig. Age- and sex-specific excess absolute risk of hospital bed-days for the selected medical conditions comparing people with and without type 2 diabetes.**  
(DOCX)

**S4 Fig. Crude hospital bed-day rates for the selected medical conditions in people with and without type 2 diabetes.**  
(DOCX)

**S5 Fig. Age- and sex-specific hospital bed-day rate ratios for the selected medical conditions comparing people with and without type 2 diabetes.**  
(DOCX)

## Acknowledgments

We acknowledge the Hong Kong Hospital Authority for providing the data.

## Author Contributions

**Conceptualization:** Hongjiang Wu, Juliana C. N. Chan, Andrea O. Y. Luk.

**Data curation:** Hongjiang Wu, Andrea O. Y. Luk.

**Formal analysis:** Hongjiang Wu, Aimin Yang, Eric S. H. Lau, Xinge Zhang, Baoqi Fan.

**Investigation:** Hongjiang Wu, Aimin Yang, Eric S. H. Lau, Xinge Zhang, Baoqi Fan, Mai Shi, Chuiguo Huang, Juliana C. N. Chan, Andrea O. Y. Luk.

**Methodology:** Hongjiang Wu, Juliana C. N. Chan, Andrea O. Y. Luk.

**Project administration:** Andrea O. Y. Luk.

**Resources:** Andrea O. Y. Luk.

**Supervision:** Juliana C. N. Chan, Andrea O. Y. Luk.

**Validation:** Aimin Yang, Eric S. H. Lau.

**Visualization:** Hongjiang Wu.

**Writing – original draft:** Hongjiang Wu, Aimin Yang, Eric S. H. Lau, Xinge Zhang, Baoqi Fan, Ronald C. W. Ma, Alice P. S. Kong, Elaine Chow, Wing-Yee So, Juliana C. N. Chan, Andrea O. Y. Luk.

**Writing – review & editing:** Hongjiang Wu, Aimin Yang, Eric S. H. Lau, Xinge Zhang, Baoqi Fan, Mai Shi, Chuiguo Huang, Ronald C. W. Ma, Alice P. S. Kong, Elaine Chow, Wing-Yee So, Juliana C. N. Chan, Andrea O. Y. Luk.

## References

1. Sun H, Saeedi P, Karuranga S, Pinkepank M, Ogurtsova K, Duncan BB, et al. IDF Diabetes Atlas: Global, regional and country-level diabetes prevalence estimates for 2021 and projections for 2045. *Diabetes Res Clin Pract.* 2022. <https://doi.org/10.1016/j.diabres.2021.109119> PMID: 34879977
2. Magliano DJ, Sacre JW, Harding JL, Gregg EW, Zimmet PZ, Shaw JE. Young-onset type 2 diabetes mellitus—implications for morbidity and mortality. *Nat Rev Endocrinol.* 2020; 16(6):321–31. <https://doi.org/10.1038/s41574-020-0334-z> PMID: 32203408

3. Wu H, Patterson C, Zhang X, Ghani R, Magliano D, Boyko E, et al. Worldwide estimates of incidence of type 2 diabetes in children and adolescents in 2021. *Diabetes Res Clin Pract.* 2022; 185:109785. <https://doi.org/10.1016/j.diabres.2022.109785> PMID: 35189261
4. Tomic D, Shaw JE, Magliano DJ. The burden and risks of emerging complications of diabetes mellitus. *Nat Rev Endocrinol.* 2022:1–15. <https://doi.org/http%3A//doi.org/10.1038/s41574-022-00690-7> PMID: 35668219
5. Ke C, Lau E, Shah BR, Stukel TA, Ma RC, So W-Y, et al. Excess burden of mental illness and hospitalization in young-onset type 2 diabetes: a population-based cohort study. *Ann Intern Med.* 2019; 170(3):145–54. <https://doi.org/10.7326/M18-1900> PMID: 30641547
6. Food and Health Bureau. Your Health, Your Life: Healthcare Reform Consultation Document. Hong Kong: Hong Kong Special Administrative Region Government 2008 [cited 2022 Aug 10]. Available from: [http://www.fhb.gov.hk/beStrong/files/consultation/chapter1\\_eng.pdf](http://www.fhb.gov.hk/beStrong/files/consultation/chapter1_eng.pdf).
7. Wu H, Lau ESH, Yang A, Zhang X, Ma RCW, Kong APS, et al. Data Resource Profile: The Hong Kong Diabetes Surveillance Database (HKDSD). *Int J Epidemiol.* 2022; 51(2):e9–e17. <https://doi.org/10.1093/ije/dyab252> PMID: 34904159
8. Zhang X, Wu H, Fan B, Shi M, Lau ESH, Yang A, et al. Lifetime risk of developing diabetes in Chinese people with normoglycemia or prediabetes: A modeling study. *PLoS Med.* 2022; 19(7):e1004045. <https://doi.org/10.1371/journal.pmed.1004045> PMID: 35862297
9. Wu H, Lau ESH, Yang A, Szeto C-C, Ma RCW, Kong APS, et al. Trends in kidney failure and kidney replacement therapy in people with diabetes in Hong Kong, 2002–2015: A retrospective cohort study. *Lancet Reg Health West Pac.* 2021; 11:100165. <https://doi.org/10.1016/j.lanwpc.2021.100165> PMID: 34327367
10. Luk AOY, Ke C, Lau ESH, Wu H, Goggins W, Ma RCW, et al. Secular trends in incidence of type 1 and type 2 diabetes in Hong Kong: A retrospective cohort study. *PLoS Med.* 2020; 17(2):e1003052. <https://doi.org/10.1371/journal.pmed.1003052> PMID: 32078650
11. Pearce N. Analysis of matched case-control studies. *BMJ.* 2016; 352:i969. <https://doi.org/10.1136/bmj.i969> PMID: 26916049
12. Ohkuma T, Komorita Y, Peters SAE, Woodward M. Diabetes as a risk factor for heart failure in women and men: a systematic review and meta-analysis of 47 cohorts including 12 million individuals. *Diabetologia.* 2019; 62(9):1550–60. <https://doi.org/10.1007/s00125-019-4926-x> PMID: 31317230
13. Ben Q, Xu M, Ning X, Liu J, Hong S, Huang W, et al. Diabetes mellitus and risk of pancreatic cancer: A meta-analysis of cohort studies. *Eur J Cancer.* 2011; 47(13):1928–37. <https://doi.org/10.1016/j.ejca.2011.03.003> PMID: 21458985
14. Tomic D, Salim A, Morton JI, Magliano DJ, Shaw JE. Reasons for hospitalisation in Australians with type 2 diabetes compared to the general population, 2010–2017. *Diabetes Res Clin Pract.* 2022; 194:110143. <https://doi.org/10.1016/j.diabres.2022.110143> PMID: 36370894
15. Pearson-Stuttard J, Cheng YJ, Bennett J, Vamos EP, Zhou B, Valabhji J, et al. Trends in leading causes of hospitalisation of adults with diabetes in England from 2003 to 2018: an epidemiological analysis of linked primary care records. *Lancet Diabetes Endocrinol.* 2022; 10(1):46–57. [https://doi.org/10.1016/S2213-8587\(21\)00288-6](https://doi.org/10.1016/S2213-8587(21)00288-6) PMID: 34861153
16. Brown AF, Ettner SL, Piette J, Weinberger M, Gregg E, Shapiro MF, et al. Socioeconomic position and health among persons with diabetes mellitus: a conceptual framework and review of the literature. *Epidemiol Rev.* 2004; 26(1):63–77. <https://doi.org/10.1093/epirev/mxh002> PMID: 15234948
17. Said MA, Verweij N, van der Harst P. Associations of combined genetic and lifestyle risks with incident cardiovascular disease and diabetes in the UK Biobank study. *JAMA Cardiol.* 2018; 3(8):693–702. <https://doi.org/10.1001/jamacardio.2018.1717> PMID: 29955826
18. Ling C, Groop L. Epigenetics: a molecular link between environmental factors and type 2 diabetes. *Diabetes.* 2009; 58(12):2718–25. <https://doi.org/10.2337/db09-1003> PMID: 19940235
19. Comino EJ, Harris MF, Islam MD, Tran DT, Jalaludin B, Jorm L, et al. Impact of diabetes on hospital admission and length of stay among a general population aged 45 year or more: a record linkage study. *BMC Health Serv Res.* 2015; 15:12. <https://doi.org/10.1186/s12913-014-0666-2> PMID: 25609196
20. Low Wang CC, Hess CN, Hiatt WR, Goldfine AB. Clinical update: cardiovascular disease in diabetes mellitus: atherosclerotic cardiovascular disease and heart failure in type 2 diabetes mellitus—mechanisms, management, and clinical considerations. *Circulation.* 2016; 133(24):2459–502. <https://doi.org/10.1161/CIRCULATIONAHA.116.022194> PMID: 27297342
21. Nanayakkara N, Curtis AJ, Heritier S, Gadowski AM, Pavkov ME, Kenealy T, et al. Impact of age at type 2 diabetes mellitus diagnosis on mortality and vascular complications: systematic review and meta-analyses. *Diabetologia.* 2020. <https://doi.org/10.1007/s00125-020-05319-w> PMID: 33313987

22. Wu H, Lau ESH, Yang A, Ma RCW, Kong APS, Chow E, et al. Young age at diabetes diagnosis amplifies the effect of diabetes duration on risk of chronic kidney disease. *Diabetologia*. 2021; 64(9):1990–2000. <https://doi.org/http%3A//doi.org/10.1007/s00125-021-05494-4> PMID: 34121143
23. Ke C, Shah BR, Luk AO, Di Ruggiero E, Chan JCN. Cardiovascular outcomes trials in type 2 diabetes: Time to include young adults. *Diabetes Obes Metab*. 2020; 22(1):3–5. <https://doi.org/10.1111/dom.13874> PMID: 31486276
24. TODAY Study Group. Effects of metformin, metformin plus rosiglitazone, and metformin plus lifestyle on insulin sensitivity and  $\beta$ -cell function in TODAY. *Diabetes Care*. 2013; 36(6):1749–57. <https://doi.org/http%3A//doi.org/10.2337/dc12-2393> PMID: 23704674
25. Yeung RO, Zhang Y, Luk A, Yang W, Sobrepena L, Yoon K-H, et al. Metabolic profiles and treatment gaps in young-onset type 2 diabetes in Asia (the JADE programme): a cross-sectional study of a prospective cohort. *Lancet Diabetes Endocrinol*. 2014; 2(12):935–43. [https://doi.org/10.1016/S2213-8587\(14\)70137-8](https://doi.org/10.1016/S2213-8587(14)70137-8) PMID: 25081582
26. Ke C, Stukel TA, Shah BR, Lau E, Ma RC, So W-Y, et al. Age at diagnosis, glycemic trajectories, and responses to oral glucose-lowering drugs in type 2 diabetes in Hong Kong: A population-based observational study. *PLoS Med*. 2020; 17(9):e1003316–e. <https://doi.org/10.1371/journal.pmed.1003316> PMID: 32946450
27. Mezuk B, Eaton WW, Albrecht S, Golden SH. Depression and type 2 diabetes over the lifespan: a meta-analysis. *Diabetes Care*. 2008; 31(12):2383–90. <https://doi.org/10.2337/dc08-0985> PMID: 19033418
28. Solmi M, Radua J, Olivola M, Croce E, Soardo L, Salazar de Pablo G, et al. Age at onset of mental disorders worldwide: large-scale meta-analysis of 192 epidemiological studies. *Mol Psychiatry*. 2022; 27(1):281–95. <https://doi.org/http%3A//doi.org/10.1038/s41380-021-01161-7> PMID: 34079068
29. Jackson CA, Fleetwood K, Kerssens J, Smith DJ, Mercer S, Wild SH. Incidence of type 2 diabetes in people with a history of hospitalization for major mental illness in Scotland, 2001–2015: A retrospective cohort study. *Diabetes Care*. 2019; 42(10):1879–85. <https://doi.org/10.2337/dc18-2152> PMID: 31471379
30. Golden SH. A review of the evidence for a neuroendocrine link between stress, depression and diabetes mellitus. *Curr Diabetes Rev*. 2007; 3(4):252–9. <https://doi.org/10.2174/157339907782330021> PMID: 18220683
31. Galling B, Roldán A, Nielsen RE, Nielsen J, Gerhard T, Carbon M, et al. Type 2 diabetes mellitus in youth exposed to antipsychotics: A systematic review and meta-analysis. *JAMA Psychiatry*. 2016; 73(3):247–59. <https://doi.org/10.1001/jamapsychiatry.2015.2923> PMID: 26792761
32. Zhang Y, Ting RZ, Yang W, Jia W, Li W, Ji L, et al. Depression in Chinese patients with type 2 diabetes: associations with hyperglycemia, hypoglycemia, and poor treatment adherence. *J Diabetes*. 2015; 7(6):800–8. <https://doi.org/10.1111/1753-0407.12238> PMID: 25349949
33. Pablo A. New IDF clinical practice recommendations for managing type 2 diabetes in primary care. *Diabetes Res Clin Pract*. 2017; 132:169–170. <https://doi.org/10.1016/j.diabres.2017.09.002> PMID: 28962686
34. Draznin B, Aroda VR, Bakris G, Benson G, Brown FM, Freeman R, et al. 5. Facilitating behavior change and well-being to improve health outcomes: Standards of Medical Care in Diabetes-2022. *Diabetes Care*. 2022; 45(Suppl 1):S60–s82. <https://doi.org/10.2337/dc22-S005> PMID: 34964866
35. Li C, Ford ES, Zhao G, Ahluwalia IB, Pearson WS, Mokdad AH. Prevalence and correlates of undiagnosed depression among U.S. adults with diabetes: the Behavioral Risk Factor Surveillance System, 2006. *Diabetes Res Clin Pract*. 2009; 83(2):268–79. <https://doi.org/10.1016/j.diabres.2008.11.006> PMID: 19111364
36. Holt RI, Mitchell AJ. Diabetes mellitus and severe mental illness: mechanisms and clinical implications. *Nat Rev Endocrinol*. 2015; 11(2):79–89. <https://doi.org/10.1038/nrendo.2014.203> PMID: 25445848
37. Lim LL, Lau ESH, Ozaki R, Chung H, Fu AWC, Chan W, et al. Association of technologically assisted integrated care with clinical outcomes in type 2 diabetes in Hong Kong using the prospective JADE Program: A retrospective cohort analysis. *PLoS Med*. 2020; 17(10):e1003367. <https://doi.org/10.1371/journal.pmed.1003367> PMID: 33007052
38. Rodda J, Walker Z, Carter J. Depression in older adults. *BMJ*. 2011; 343:d5219. <https://doi.org/10.1136/bmj.d5219> PMID: 21957206
39. Du T, Fernandez C, Barshop R, Guo Y, Krousel-Wood M, Chen W, et al. Sex differences in cardiovascular risk profile from childhood to midlife between individuals who did and did not develop diabetes at follow-up: the Bogalusa Heart Study. *Diabetes Care*. 2019; 42(4):635–43. <https://doi.org/10.2337/dc18-2029> PMID: 30692238
40. Wright AK, Welsh P, Gill JMR, Kontopantelis E, Emsley R, Buchan I, et al. Age-, sex- and ethnicity-related differences in body weight, blood pressure, HbA(1c) and lipid levels at the diagnosis of type 2



diabetes relative to people without diabetes. *Diabetologia*. 2020; 63(8):1542–53. <https://doi.org/10.1007/s00125-020-05169-6> PMID: 32435821

41. Wright AK, Kontopantelis E, Emsley R, Buchan I, Mamas MA, Sattar N, et al. Cardiovascular risk and risk factor management in type 2 diabetes mellitus. *Circulation*. 2019; 139(24):2742–53. <https://doi.org/10.1161/CIRCULATIONAHA.118.039100> PMID: 30986362
42. Burns EM, Rigby E, Mamidanna R, Bottle A, Aylin P, Ziprin P, et al. Systematic review of discharge coding accuracy. *J Public Health*. 2012; 34(1):138–48. <https://doi.org/10.1093/pubmed/fdr054> PMID: 21795302
43. Sachar A, Breslin N, Ng SM. An integrated care model for mental health in diabetes: Recommendations for local implementation by the Diabetes and Mental Health Expert Working Group in England. *Diabet Med*. 2023; 40(4):e15029. <https://doi.org/10.1111/dme.15029> PMID: 36537609
44. Young-Hyman D, de Groot M, Hill-Briggs F, Gonzalez JS, Hood K, Peyrot M. Psychosocial Care for People With Diabetes: A Position Statement of the American Diabetes Association. *Diabetes Care*. 2016; 39(12):2126–40. <https://doi.org/10.2337/dc16-2053> PMID: 27879358
